# Supplementary material for: Function and evolution of allelic variations of Sr13 conferring resistance to stem rust in tetraploid wheat (Triticum turgidum L.)
Source: PubMed Central journal article supplement (PMC8362117; doi:10.1111/tpj.15263), 2021-05-29

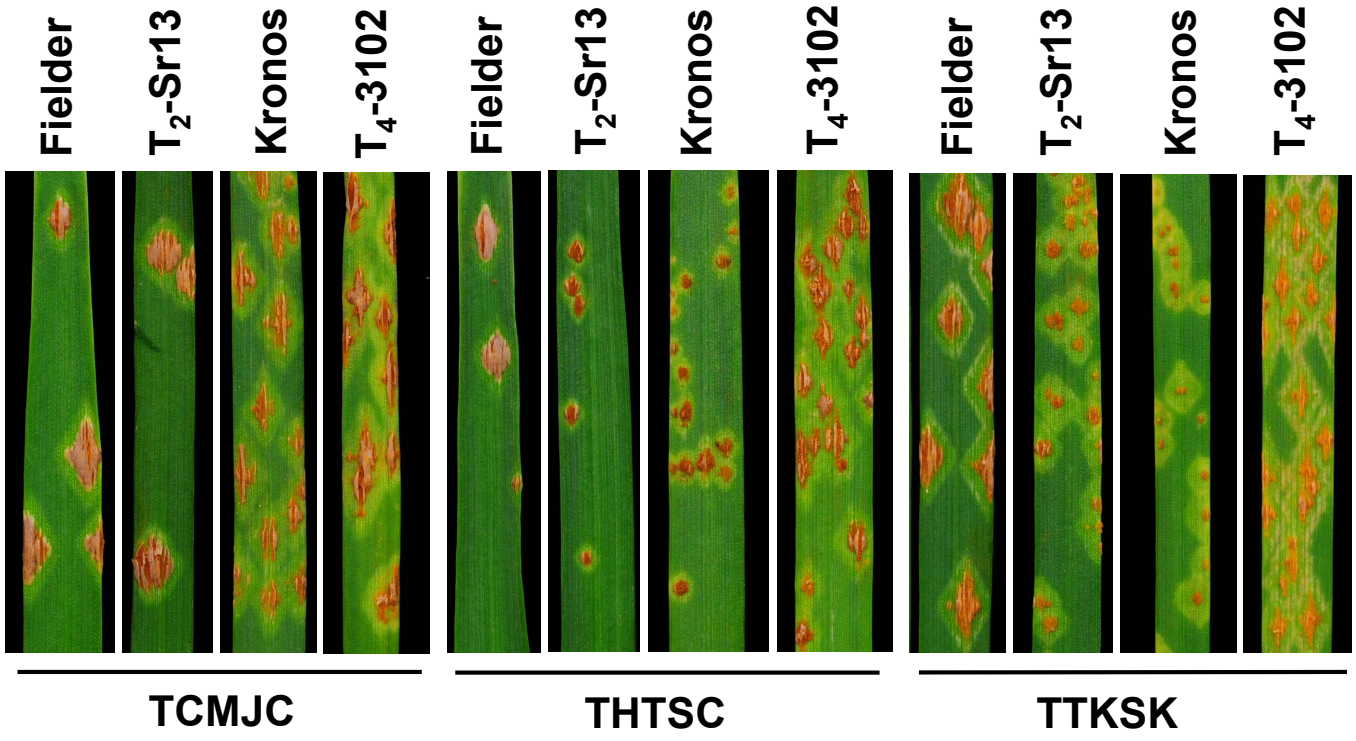

Supplement: TPJ-106-1674-s008.pdf [file TPJ-106-1674-s008.pdf]
